# Supplementary material
Source: Springer Nature journal article supplement (https://www.springermedizin.de/resource/supplementary/12933_2011_463_MOESM1_ESM.pdf/9538562)

(a)

Graph Shows the Distribution of SVC Response within each Grade of AN (Study 1 Data)

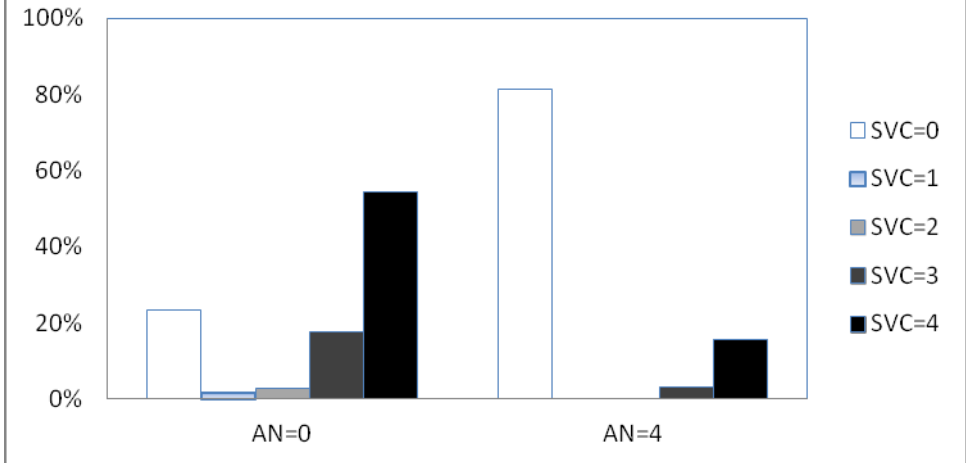

(b)

Graph Shows the Distribution of SVC Response within each Grade of AN (Study 2 Data)

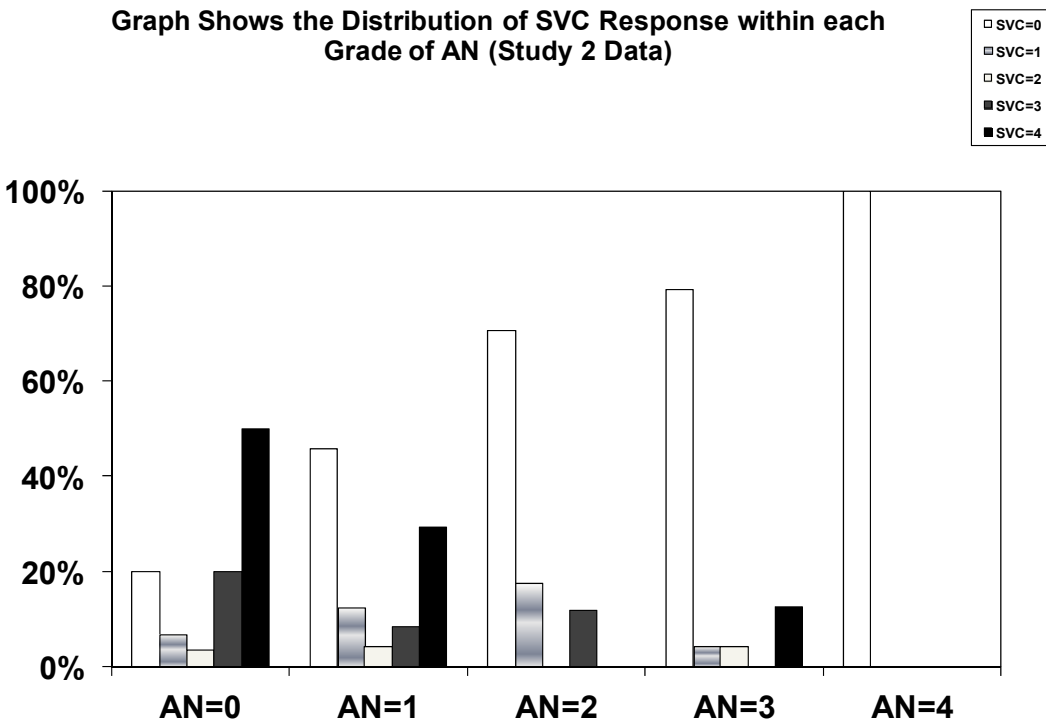

Supplement: MOESM1 [file 9538562]
